# Supplementary material for: Usability of Immortalized Porcine Kidney Macrophage Cultures for the Isolation of ASFV without Affecting Virulence
Source: MDPI journal article supplement (doi:10.3390/v14081794), 2022-08-16
Supplement: s1 [file s1]

**Table S1.** Genetic difference in the genome DNA of ASFV isolated in PAM and IPKM cells.

| Gene             | Position <sup>a</sup> | AQS-C-1-21 |          | AQS-C-1-22            |             | AQS-P-20901-1  |               | AQS-P-201202 |               |
|------------------|-----------------------|------------|----------|-----------------------|-------------|----------------|---------------|--------------|---------------|
|                  |                       | PAM        | IPKM     | PAM                   | IPKM        | PAM            | IPKM          | PAM          | IPKM          |
| NCR <sup>b</sup> | 426                   | CCCC       | CCCC     | <u>C</u> <sup>c</sup> | <u>CCCC</u> | CC             | CC            | CCCC         | CCCC          |
| MGF 110-14L      | 13265-70              | <u>AC</u>  | <u>A</u> | <u>CCCCCCC</u>        | <u>A</u>    | ACCCCC         | ACCCCC        | <u>ACCCC</u> | <u>ACCCCC</u> |
| MGF 110-13L      | 14708                 | CCCC       | CCCC     | CCCC                  | CCCC        | - <sup>d</sup> | -             | <u>C</u>     | -             |
| NCR              | 16664                 | GG         | GG       | -                     | <u>GG</u>   | <u>G</u>       | -             | G            | G             |
| NCR              | 16877                 | G          | G        | -                     | <u>G</u>    | -              | -             | -            | -             |
| NCR              | 19032-37              | -----      | -----    | <u>GGGGGG</u>         | -----       | <u>GGGGG</u>   | <u>GGGGGG</u> | <u>GGGG</u>  | <u>G</u>      |
| NCR              | 20835-37              | ---        | ---      | <u>GGG</u>            | ---         | <u>GGGG</u>    | <u>GGG</u>    | GGGGG        | GGGGG         |
| G1340L           | 110729                | G          | G        | <u>A</u>              | <u>G</u>    | G              | G             | G            | G             |

a: Nucleotide position number is based on the sequence of the ASFV Pig/HLJ/2018.

b: NCR is an abbreviation for non-coding region.

c: Under bars show the nucleotide differences between PAM and IPKM passaged viruses.

d: The bars indicate the nucleotide deletion compared with ASFV Pig/HLJ/2018.
